# Supplementary material for: Efficacy of N -acetylcysteine on idiopathic or postinfective non-cystic fibrosis bronchiectasis: a systematic review and meta-analysis protocol
Source: HighWire-hosted journal article supplement (doi:10.1136/bmjopen-2021-053625), 2022-03-01
Supplement: bmjopen-2021-053625supp001_data_supplement.pdf [file bmjopen-2021-053625supp001_data_supplement.pdf]

# Full search strategy

## Efficacy of *N*-acetylcysteine on Idiopathic or Post-infective Non-cystic Fibrosis Bronchiectasis: A Systematic Review and Meta-analysis Protocol

### DATABASE SEARCH STRATEGIES

#### Database: PubMed

Search:

#1 Bronchiectasis [(MeSH Terms)]  
#2 Acetylcysteine [(MeSH Terms)]  
#3 Non-cystic fibrosis bronchiectasis [Title/Abstract]  
#4 Non-CF bronchiectasis [Title/Abstract]  
#5 N-acetylcysteine [Title/Abstract]  
#6 NAC [Title/Abstract]  
#7 #1 OR #3 OR #4  
#8 #2 OR #5 OR #6  
#9 #7 AND #8  
#10 Clinical trials as topic [(MeSH Terms)]  
#11 Randomized controlled trial [Title/Abstract]  
#12 Randomized clinical trial [Title/Abstract]  
#13 Controlled clinical trial [Title/Abstract]  
#14 Randomly [Title/Abstract]  
#15 Randomized [Title/Abstract]  
#16 Trial [Title/Abstract]  
#17 #10 OR #11 OR #12 OR #13 OR #14 OR #15 OR #16  
#18 #9 AND #17

OR

((((Bronchiectasis[MeSH Terms]) OR (Non-cystic fibrosis bronchiectasis[Title/Abstract])) OR (Non-CF bronchiectasis[Title/Abstract])) AND (((Acetylcysteine[MeSH Terms]) OR (N-acetylcysteine[Title/Abstract])) OR (NAC[Title/Abstract]))) AND (((((((Clinical trials as topic[MeSH Terms]) OR (Randomized controlled trial[Title/Abstract])) OR (Randomized clinical trial[Title/Abstract])) OR (Controlled clinical trial[Title/Abstract])) OR (Randomly[Title/Abstract])) OR (Randomized[Title/Abstract])) OR (Trial[Title/Abstract]))

#### Databases: Embase (via ovid)

Search:

#1 exp bronchiectasis/  
#2 exp acetylcysteine/  
#3 (Non-cystic fibrosis bronchiectasis or Non-CF bronchiectasis).ab  
#4 #1 or #3  
#5 (N-acetylcysteine or NAC).ab  
#6 #2 or #5  
#7 #4 and #6  
#8 (Clinical trial or Randomized controlled trial or Randomized clinical trial or Controlled clinical trial or Randomly or Randomized or Trial).ab.ti  
#9 #7 and #8

#### Databases: Web of Science

Search:

1. ((TS=(Bronchiectasis)) OR ALL=(Non-cystic fibrosis bronchiectasis)) OR ALL=(Non-CF bronchiectasis)
2. ((TS=(Acetylcysteine)) OR ALL=(N-acetylcysteine)) OR ALL=(NAC)
3. 1 AND 2
4. ((((((ALL=(Clinical trial)) OR ALL=(Randomized controlled trial)) OR ALL=(Randomized clinical trial)) OR ALL=(Controlled clinical trial)) OR ALL=(Randomly )) OR ALL=(Randomized)) OR ALL=(Trial)
5. 3 AND 4

#### Databases: Cochrane Library

Search:

#1 MeSH descriptor: [Bronchiectasis] explode all trees  
#2 MeSH descriptor: [Acetylcysteine] explode all trees  
#3 (non-cystic fibrosis bronchiectasis):ti,ab,kw OR (non-CF bronchiectasis):ti,ab,kw  
#4 (N-acetylcysteine):ti,ab,kw OR (NAC):ti,ab,kw  
#5 (randomized controlled trial):ti,ab,kw OR (randomized clinical trial):ti,ab,kw OR (controlled clinical trial):ti,ab,kw OR (randomly):ti,ab,kw OR (randomized):ti,ab,kw OR (trial):ti,ab,kw  
#6 #1 OR #3  
#7 #2 OR #4  
#8 #6 AND #7 AND #5

**Other Databases: Chinese Clinical Trial Registry (<http://www.chictr.org.cn>) and ClinicalTrials.gov (<http://www.clinicaltrials.gov/>)**

**Search:**

As described above, Using a combination of text terms and subject headings where applicable.
